# Supplementary material
Source: publisher figshare collection journal article supplement (https://acs.figshare.com/ndownloader/files/4706563)
Supplement: Supplementary file 1 [file 4706563]

  
data_jrc0831n 
  
_audit_creation_method            SHELXL-97 
_chemical_name_systematic 
; 
 ? 
; 
_chemical_name_common             jrc0831n 
_chemical_melting_point           ? 
_chemical_formula_moiety          
 'C18 H15 Cl F2 O3 S' 
_chemical_formula_sum 
 'C18 H15 Cl F2 O3 S' 
_chemical_formula_weight          384.81
 
  
loop_ 
 _atom_type_symbol 
 _atom_type_description 
 _atom_type_scat_dispersion_real 
 _atom_type_scat_dispersion_imag 
 _atom_type_scat_source 
 'C'  'C'   0.0033   0.0016 
 'International Tables Vol C Tables 4.2.6.8 and 6.1.1.4' 
 'H'  'H'   0.0000   0.0000 
 'International Tables Vol C Tables 4.2.6.8 and 6.1.1.4' 
 'O'  'O'   0.0106   0.0060 
 'International Tables Vol C Tables 4.2.6.8 and 6.1.1.4' 
 'F'  'F'   0.0171   0.0103 
 'International Tables Vol C Tables 4.2.6.8 and 6.1.1.4' 
 'S'  'S'   0.1246   0.1234 
 'International Tables Vol C Tables 4.2.6.8 and 6.1.1.4' 
 'Cl'  'Cl'   0.1484   0.1585 
 'International Tables Vol C Tables 4.2.6.8 and 6.1.1.4' 
  
_symmetry_cell_setting            Orthorhombic 
_symmetry_space_group_name_H-M    Pca21 
_symmetry_space_group_name_Hall   p_2c_-2ac
  
loop_ 
 _symmetry_equiv_pos_as_xyz 
 'x, y, z' 
 '-x, -y, z+1/2' 
 'x+1/2, -y, z' 
 '-x+1/2, y, z+1/2' 
  
_cell_length_a                    15.450(10) 
_cell_length_b                    10.490(7) 
_cell_length_c                    10.828(7) 
_cell_angle_alpha                 90.00 
_cell_angle_beta                  90.00 
_cell_angle_gamma                 90.00 
_cell_volume                      1755(2) 
_cell_formula_units_Z             4 
_cell_measurement_temperature     298(2) 
_cell_measurement_reflns_used     3268 
_cell_measurement_theta_min       2.35 
_cell_measurement_theta_max       21.43 
  
_exptl_crystal_description        plate 
_exptl_crystal_colour             colorless 
_exptl_crystal_size_max           0.44 
_exptl_crystal_size_mid           0.30 
_exptl_crystal_size_min           0.05 
_exptl_crystal_density_meas       0 
_exptl_crystal_density_diffrn     1.456 
_exptl_crystal_density_method     'not measured' 
_exptl_crystal_F_000              792 
_exptl_absorpt_coefficient_mu     0.371 
_exptl_absorpt_correction_type    none 
_exptl_absorpt_correction_T_min   ? 
_exptl_absorpt_correction_T_max   ? 
_exptl_absorpt_process_details    ? 
  
_exptl_special_details 
; 
 ? 
; 
  
_diffrn_ambient_temperature       298(2) 
_diffrn_radiation_wavelength      0.71073 
_diffrn_radiation_type            MoK\a 
_diffrn_radiation_source          'fine-focus sealed tube' 
_diffrn_radiation_monochromator   graphite 
_diffrn_measurement_device_type   'CCD area detector' 
_diffrn_measurement_method        'phi and omega scans' 
_diffrn_detector_area_resol_mean  ? 
_diffrn_standards_number          ? 
_diffrn_standards_interval_count  ? 
_diffrn_standards_interval_time   ? 
_diffrn_standards_decay_%         ? 
_diffrn_reflns_number             13312 
_diffrn_reflns_av_R_equivalents   0.1182 
_diffrn_reflns_av_sigmaI/netI     0.0745 
_diffrn_reflns_limit_h_min        -19 
_diffrn_reflns_limit_h_max        19 
_diffrn_reflns_limit_k_min        -12 
_diffrn_reflns_limit_k_max        13 
_diffrn_reflns_limit_l_min        -12 
_diffrn_reflns_limit_l_max        13 
_diffrn_reflns_theta_min          1.94 
_diffrn_reflns_theta_max          26.47 
_reflns_number_total              3373 
_reflns_number_gt                 2707 
_reflns_threshold_expression      >2sigma(I) 
  
_computing_data_collection        'Bruker SMART' 
_computing_cell_refinement        'Bruker SMART' 
_computing_data_reduction         'Bruker SAINT' 
_computing_structure_solution     'SHELXS-97 (Sheldrick, 1990)' 
_computing_structure_refinement   'SHELXL-97 (Sheldrick, 1997)' 
_computing_molecular_graphics     'Bruker SHELXTL' 
_computing_publication_material   'Bruker SHELXTL' 
  
_refine_special_details 
; 
 Refinement of F^2^ against ALL reflections.  The weighted R-factor wR and 
 goodness of fit S are based on F^2^, conventional R-factors R are based 
 on F, with F set to zero for negative F^2^. The threshold expression of 
 F^2^ > 2sigma(F^2^) is used only for calculating R-factors(gt) etc. and is 
 not relevant to the choice of reflections for refinement.  R-factors based 
 on F^2^ are statistically about twice as large as those based on F, and R- 
 factors based on ALL data will be even larger. 
; 
  
_refine_ls_structure_factor_coef  Fsqd 
_refine_ls_matrix_type            full 
_refine_ls_weighting_scheme       calc 
_refine_ls_weighting_details 
 'calc w=1/[\s^2^(Fo^2^)+(0.0618P)^2^+0.0000P] where P=(Fo^2^+2Fc^2^)/3' 
_atom_sites_solution_primary      direct 
_atom_sites_solution_secondary    difmap 
_atom_sites_solution_hydrogens    geom 
_refine_ls_hydrogen_treatment     constr 
_refine_ls_extinction_method      none 
_refine_ls_extinction_coef        ? 
_refine_ls_abs_structure_details 
 'Flack H D (1983), Acta Cryst. A39, 876-881' 
_refine_ls_abs_structure_Flack    -0.01(9) 
_refine_ls_number_reflns          3373 
_refine_ls_number_parameters      226 
_refine_ls_number_restraints      1 
_refine_ls_R_factor_all           0.0622 
_refine_ls_R_factor_gt            0.0515 
_refine_ls_wR_factor_ref          0.1225 
_refine_ls_wR_factor_gt           0.1173 
_refine_ls_goodness_of_fit_ref    0.958 
_refine_ls_restrained_S_all       0.958 
_refine_ls_shift/su_max           0.001 
_refine_ls_shift/su_mean          0.000 
  
loop_ 
 _atom_site_label 
 _atom_site_type_symbol 
 _atom_site_fract_x 
 _atom_site_fract_y 
 _atom_site_fract_z 
 _atom_site_U_iso_or_equiv 
 _atom_site_adp_type 
 _atom_site_occupancy 
 _atom_site_symmetry_multiplicity 
 _atom_site_calc_flag 
 _atom_site_refinement_flags 
 _atom_site_disorder_assembly 
 _atom_site_disorder_group 
Cl1 Cl 0.74403(11) 0.13457(13) 0.00974(19) 0.1253(6) Uani 1 1 d . . . 
C1 C 0.8086(3) 0.2567(4) 0.0673(5) 0.0730(12) Uani 1 1 d . . . 
C2 C 0.7752(3) 0.3364(4) 0.1558(5) 0.0754(12) Uani 1 1 d . . . 
H2 H 0.7191 0.3246 0.1849 0.091 Uiso 1 1 calc R . . 
C3 C 0.8256(2) 0.4342(3) 0.2012(4) 0.0580(9) Uani 1 1 d . . . 
H3 H 0.8035 0.4895 0.2605 0.070 Uiso 1 1 calc R . . 
C4 C 0.9093(2) 0.4497(3) 0.1580(3) 0.0446(8) Uani 1 1 d . . . 
S1 S 0.97363(4) 0.57511(8) 0.21245(9) 0.0432(2) Uani 1 1 d . . . 
O1 O 0.93949(15) 0.6123(3) 0.3313(2) 0.0569(6) Uani 1 1 d . . . 
O2 O 1.06255(13) 0.5385(2) 0.2039(3) 0.0616(6) Uani 1 1 d . . . 
C5 C 0.9421(2) 0.3678(3) 0.0697(3) 0.0539(9) Uani 1 1 d . . . 
H5 H 0.9982 0.3783 0.0402 0.065 Uiso 1 1 calc R . . 
C6 C 0.8906(3) 0.2703(3) 0.0258(4) 0.0650(11) Uani 1 1 d . . . 
H6 H 0.9124 0.2138 -0.0326 0.078 Uiso 1 1 calc R . . 
C7 C 0.8017(2) 0.6814(3) 0.0204(3) 0.0493(8) Uani 1 1 d . . . 
F2 F 0.83188(15) 0.6026(2) -0.0688(2) 0.0734(7) Uani 1 1 d . . . 
C8 C 0.7137(2) 0.7021(4) 0.0225(4) 0.0641(10) Uani 1 1 d . . . 
H8 H 0.6783 0.6627 -0.0355 0.077 Uiso 1 1 calc R . . 
C9 C 0.6788(2) 0.7795(4) 0.1091(4) 0.0678(11) Uani 1 1 d . . . 
H9 H 0.6195 0.7951 0.1113 0.081 Uiso 1 1 calc R . . 
C10 C 0.7337(2) 0.8341(3) 0.1935(4) 0.0571(9) Uani 1 1 d . . . 
F1 F 0.69915(14) 0.9129(2) 0.2800(3) 0.0892(8) Uani 1 1 d . . . 
C11 C 0.82032(19) 0.8144(3) 0.1923(3) 0.0450(8) Uani 1 1 d . . . 
H11 H 0.8547 0.8544 0.2511 0.054 Uiso 1 1 calc R . . 
C12 C 0.85894(18) 0.7355(3) 0.1048(3) 0.0379(7) Uani 1 1 d . . . 
C13 C 0.95664(18) 0.7101(3) 0.1080(3) 0.0384(7) Uani 1 1 d . . . 
C14 C 1.0002(2) 0.6822(3) -0.0167(3) 0.0483(8) Uani 1 1 d . . . 
H14A H 1.0605 0.6601 -0.0033 0.058 Uiso 1 1 calc R . . 
H14B H 0.9720 0.6101 -0.0558 0.058 Uiso 1 1 calc R . . 
C15 C 1.0075(2) 0.8202(3) 0.1681(3) 0.0481(8) Uani 1 1 d . . . 
H15A H 0.9840 0.8378 0.2494 0.058 Uiso 1 1 calc R . . 
H15B H 1.0676 0.7955 0.1779 0.058 Uiso 1 1 calc R . . 
C16 C 0.9947(2) 0.7986(4) -0.1019(4) 0.0616(10) Uani 1 1 d . . . 
H16A H 1.0302 0.7830 -0.1742 0.074 Uiso 1 1 calc R . . 
H16B H 0.9354 0.8080 -0.1295 0.074 Uiso 1 1 calc R . . 
C17 C 1.0020(3) 0.9392(4) 0.0891(5) 0.0659(10) Uani 1 1 d . . . 
H17A H 0.9438 0.9733 0.0953 0.079 Uiso 1 1 calc R . . 
H17B H 1.0412 1.0025 0.1228 0.079 Uiso 1 1 calc R . . 
C18 C 1.0230(2) 0.9209(4) -0.0440(4) 0.0632(11) Uani 1 1 d . . . 
O3 O 1.0590(2) 1.0036(3) -0.1016(4) 0.1016(12) Uani 1 1 d . . . 
  
loop_ 
 _atom_site_aniso_label 
 _atom_site_aniso_U_11 
 _atom_site_aniso_U_22 
 _atom_site_aniso_U_33 
 _atom_site_aniso_U_23 
 _atom_site_aniso_U_13 
 _atom_site_aniso_U_12 
Cl1 0.1295(11) 0.0883(9) 0.1582(15) -0.0440(11) 0.0113(11) -0.0412(9) 
C1 0.081(3) 0.050(2) 0.088(3) -0.009(2) 0.010(2) -0.0138(19) 
C2 0.058(2) 0.069(3) 0.098(3) -0.006(3) 0.023(2) -0.014(2) 
C3 0.0535(17) 0.056(2) 0.065(2) -0.0036(19) 0.015(2) -0.0006(15) 
C4 0.0460(16) 0.0414(18) 0.0465(18) 0.0125(16) 0.0077(14) 0.0069(13) 
S1 0.0395(3) 0.0520(5) 0.0382(4) 0.0082(4) 0.0000(4) 0.0058(3) 
O1 0.0580(13) 0.0778(17) 0.0351(13) 0.0051(12) 0.0005(11) 0.0054(12) 
O2 0.0454(11) 0.0726(15) 0.0667(16) 0.0176(15) -0.0040(14) 0.0090(10) 
C5 0.058(2) 0.048(2) 0.056(2) 0.0070(17) 0.0208(17) 0.0071(16) 
C6 0.090(3) 0.043(2) 0.062(3) -0.0025(19) 0.022(2) 0.0044(19) 
C7 0.0535(18) 0.0502(19) 0.0441(19) -0.0072(16) -0.0101(15) 0.0020(15) 
F2 0.0749(13) 0.0855(16) 0.0598(14) -0.0360(12) -0.0152(10) 0.0057(12) 
C8 0.051(2) 0.072(2) 0.069(2) -0.005(2) -0.0204(19) -0.0039(18) 
C9 0.0395(18) 0.073(3) 0.091(3) -0.002(2) -0.010(2) 0.0084(17) 
C10 0.0509(18) 0.052(2) 0.068(3) -0.0058(19) 0.0088(18) 0.0052(15) 
F1 0.0658(14) 0.0926(18) 0.109(2) -0.0361(16) 0.0245(13) 0.0140(12) 
C11 0.0454(15) 0.0447(18) 0.0448(19) -0.0023(16) 0.0006(14) -0.0004(13) 
C12 0.0412(15) 0.0374(16) 0.0351(15) 0.0014(13) -0.0022(13) -0.0001(12) 
C13 0.0421(15) 0.0406(17) 0.0325(15) 0.0021(14) -0.0003(12) 0.0012(13) 
C14 0.0496(17) 0.054(2) 0.0414(18) 0.0072(17) 0.0088(14) 0.0039(16) 
C15 0.0440(16) 0.050(2) 0.050(2) -0.0064(17) -0.0026(13) -0.0066(14) 
C16 0.070(2) 0.073(3) 0.0421(19) 0.0116(19) 0.0096(17) 0.006(2) 
C17 0.068(2) 0.046(2) 0.084(3) 0.002(2) 0.005(2) -0.0148(18) 
C18 0.056(2) 0.059(3) 0.074(3) 0.026(2) -0.0046(19) -0.0023(18) 
O3 0.116(3) 0.090(2) 0.099(3) 0.054(2) 0.002(2) -0.025(2) 
  
_geom_special_details 
; 
 All esds (except the esd in the dihedral angle between two l.s. planes) 
 are estimated using the full covariance matrix.  The cell esds are taken 
 into account individually in the estimation of esds in distances, angles 
 and torsion angles; correlations between esds in cell parameters are only 
 used when they are defined by crystal symmetry.  An approximate (isotropic) 
 treatment of cell esds is used for estimating esds involving l.s. planes. 
; 
  
loop_ 
 _geom_bond_atom_site_label_1 
 _geom_bond_atom_site_label_2 
 _geom_bond_distance 
 _geom_bond_site_symmetry_2 
 _geom_bond_publ_flag 
Cl1 C1 1.740(4) . ? 
C1 C6 1.352(6) . ? 
C1 C2 1.373(6) . ? 
C2 C3 1.378(5) . ? 
C2 H2 0.9300 . ? 
C3 C4 1.385(4) . ? 
C3 H3 0.9300 . ? 
C4 C5 1.381(5) . ? 
C4 S1 1.751(4) . ? 
S1 O2 1.430(2) . ? 
S1 O1 1.445(3) . ? 
S1 C13 1.831(3) . ? 
C5 C6 1.381(5) . ? 
C5 H5 0.9300 . ? 
C6 H6 0.9300 . ? 
C7 F2 1.355(4) . ? 
C7 C8 1.377(5) . ? 
C7 C12 1.392(4) . ? 
C8 C9 1.352(6) . ? 
C8 H8 0.9300 . ? 
C9 C10 1.373(6) . ? 
C9 H9 0.9300 . ? 
C10 C11 1.355(4) . ? 
C10 F1 1.357(4) . ? 
C11 C12 1.392(4) . ? 
C11 H11 0.9300 . ? 
C12 C13 1.533(4) . ? 
C13 C14 1.537(5) . ? 
C13 C15 1.541(4) . ? 
C14 C16 1.533(5) . ? 
C14 H14A 0.9700 . ? 
C14 H14B 0.9700 . ? 
C15 C17 1.516(6) . ? 
C15 H15A 0.9700 . ? 
C15 H15B 0.9700 . ? 
C16 C18 1.493(6) . ? 
C16 H16A 0.9700 . ? 
C16 H16B 0.9700 . ? 
C17 C18 1.490(7) . ? 
C17 H17A 0.9700 . ? 
C17 H17B 0.9700 . ? 
C18 O3 1.204(5) . ? 
  
loop_ 
 _geom_angle_atom_site_label_1 
 _geom_angle_atom_site_label_2 
 _geom_angle_atom_site_label_3 
 _geom_angle 
 _geom_angle_site_symmetry_1 
 _geom_angle_site_symmetry_3 
 _geom_angle_publ_flag 
C6 C1 C2 121.4(4) . . ? 
C6 C1 Cl1 119.7(3) . . ? 
C2 C1 Cl1 118.9(3) . . ? 
C1 C2 C3 119.3(4) . . ? 
C1 C2 H2 120.3 . . ? 
C3 C2 H2 120.3 . . ? 
C2 C3 C4 119.6(4) . . ? 
C2 C3 H3 120.2 . . ? 
C4 C3 H3 120.2 . . ? 
C5 C4 C3 120.2(3) . . ? 
C5 C4 S1 119.5(3) . . ? 
C3 C4 S1 120.3(3) . . ? 
O2 S1 O1 118.76(16) . . ? 
O2 S1 C4 108.75(16) . . ? 
O1 S1 C4 107.22(16) . . ? 
O2 S1 C13 107.78(14) . . ? 
O1 S1 C13 106.79(15) . . ? 
C4 S1 C13 106.97(15) . . ? 
C6 C5 C4 119.2(3) . . ? 
C6 C5 H5 120.4 . . ? 
C4 C5 H5 120.4 . . ? 
C1 C6 C5 120.2(4) . . ? 
C1 C6 H6 119.9 . . ? 
C5 C6 H6 119.9 . . ? 
F2 C7 C8 116.6(3) . . ? 
F2 C7 C12 119.9(3) . . ? 
C8 C7 C12 123.5(3) . . ? 
C9 C8 C7 120.0(3) . . ? 
C9 C8 H8 120.0 . . ? 
C7 C8 H8 120.0 . . ? 
C8 C9 C10 117.8(3) . . ? 
C8 C9 H9 121.1 . . ? 
C10 C9 H9 121.1 . . ? 
C11 C10 F1 119.2(3) . . ? 
C11 C10 C9 122.7(4) . . ? 
F1 C10 C9 118.1(3) . . ? 
C10 C11 C12 121.4(3) . . ? 
C10 C11 H11 119.3 . . ? 
C12 C11 H11 119.3 . . ? 
C7 C12 C11 114.6(3) . . ? 
C7 C12 C13 124.7(3) . . ? 
C11 C12 C13 120.6(3) . . ? 
C12 C13 C14 116.4(3) . . ? 
C12 C13 C15 112.4(2) . . ? 
C14 C13 C15 106.9(3) . . ? 
C12 C13 S1 106.9(2) . . ? 
C14 C13 S1 109.4(2) . . ? 
C15 C13 S1 104.2(2) . . ? 
C16 C14 C13 110.6(3) . . ? 
C16 C14 H14A 109.5 . . ? 
C13 C14 H14A 109.5 . . ? 
C16 C14 H14B 109.5 . . ? 
C13 C14 H14B 109.5 . . ? 
H14A C14 H14B 108.1 . . ? 
C17 C15 C13 110.5(3) . . ? 
C17 C15 H15A 109.5 . . ? 
C13 C15 H15A 109.5 . . ? 
C17 C15 H15B 109.5 . . ? 
C13 C15 H15B 109.5 . . ? 
H15A C15 H15B 108.1 . . ? 
C18 C16 C14 114.6(3) . . ? 
C18 C16 H16A 108.6 . . ? 
C14 C16 H16A 108.6 . . ? 
C18 C16 H16B 108.6 . . ? 
C14 C16 H16B 108.6 . . ? 
H16A C16 H16B 107.6 . . ? 
C18 C17 C15 115.3(4) . . ? 
C18 C17 H17A 108.4 . . ? 
C15 C17 H17A 108.4 . . ? 
C18 C17 H17B 108.4 . . ? 
C15 C17 H17B 108.4 . . ? 
H17A C17 H17B 107.5 . . ? 
O3 C18 C17 120.6(4) . . ? 
O3 C18 C16 122.4(5) . . ? 
C17 C18 C16 116.9(3) . . ? 
  
_diffrn_measured_fraction_theta_max    0.996 
_diffrn_reflns_theta_full              26.47 
_diffrn_measured_fraction_theta_full   0.996 
_refine_diff_density_max    0.303 
_refine_diff_density_min   -0.172 
_refine_diff_density_rms    0.057 
